# Supplementary material
Source: HighWire-hosted journal article supplement (https://erj.ersjournals.com/content/54/4/1901030)
Supplement: inline-supplementary-material-1 [file inline-supplementary-material-1.pdf]

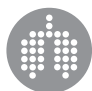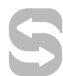

SHAREABLE PDF

# Efficacy and safety of ralinepag, a novel oral IP agonist, in PAH patients on mono or dual background therapy: results from a phase 2 randomised, parallel group, placebo-controlled trial

Fernando Torres<sup>1</sup>, Harrison Farber<sup>2</sup>, Arsen Ristic<sup>3</sup>, Vallerie McLaughlin<sup>4</sup>, John Adams<sup>5</sup>, Jinkun Zhang<sup>5</sup>, Preston Klassen<sup>5</sup>, William Shanahan<sup>6</sup>, John Grundy<sup>5</sup>, Ines Hoffmann<sup>5</sup>, Christopher Cabell<sup>5</sup>, Pilar Escribano Subías <sup>7</sup>, Namita Sood<sup>8</sup>, Anne Keogh<sup>9</sup>, Gwyn D'Souza<sup>5</sup> and Lewis Rubin<sup>10</sup>

**Affiliations:** <sup>1</sup>Pulmonary/Critical Care, UT Southwestern Medical Center, William P. Clements Jr University Hospital, Dallas, TX, USA. <sup>2</sup>Pulmonary and Critical Care, Boston Medical Center, Boston University, Boston, MA, USA. <sup>3</sup>Dept of Cardiology, Clinical Center of Serbia and Belgrade University School of Medicine, Belgrade, Serbia. <sup>4</sup>Cardiovascular Medicine, University of Michigan, Ann Arbor, MI, USA. <sup>5</sup>Arena Pharmaceuticals, San Diego, CA, USA. <sup>6</sup>Hessian Pharmaceuticals, Hayward, CA, USA. <sup>7</sup>Dept of Cardiology, Hospital Universitario 12 de Octubre, Complutense University, Madrid, Spain. <sup>8</sup>University of Texas, Houston, TX, USA. <sup>9</sup>Heart Transplant, St Vincent's Hospital, Sydney, Australia. <sup>10</sup>Division of Pulmonary and Critical Care Medicine, University of California, San Diego, CA, USA.

**Correspondence:** Lewis J. Rubin, Division of Pulmonary and Critical Care Medicine, 9300 Campus Point Drive, M/C7372, University of California, San Diego, La Jolla, CA 92037-1300, USA. E-mail: [ljrubin@ucsd.edu](mailto:ljrubin@ucsd.edu)

 @ERSpublications

In this 22-week randomised, placebo-controlled phase 2 study of PAH patients on single or dual oral background therapy, ralinepag, an oral IP receptor agonist, significantly reduced PVR. <http://bit.ly/2XHScCO>

**Cite this article as:** Torres F, Farber H, Ristic A, *et al.* Efficacy and safety of ralinepag, a novel oral IP agonist, in PAH patients on mono or dual background therapy: results from a phase 2 randomised, parallel group, placebo-controlled trial. *Eur Respir J* 2019; 54: 1901030 [<https://doi.org/10.1183/13993003.01030-2019>].

This single-page version can be shared freely online.

## ABSTRACT

**Purpose:** This phase 2 study was designed to assess the efficacy, safety and tolerability of immediate-release orally administered ralinepag, a selective, non-prostanoid prostacyclin receptor agonist with a 24-h terminal half-life, compared to placebo in adult patients with symptomatic pulmonary arterial hypertension (PAH).

**Methods:** 61 PAH patients who were receiving standard care, including mono or dual PAH-targeted background therapy were randomised 2:1 to ralinepag (n=40) or placebo (n=21). The starting dose of ralinepag was 10 µg twice daily. Dosage was then up-titrated as tolerated over the course of the 9-week dose-titration period, to a maximum total daily dose of 600 µg (300 µg twice daily). The primary efficacy end-point was the absolute change in pulmonary vascular resistance (PVR) from baseline to week 22. Additional end-points included percentage change in PVR from baseline, other haemodynamic parameters, 6-min walk distance (6MWD) and safety and tolerability.

**Results:** Ralinepag significantly decreased PVR by  $163.9 \text{ dyn}\cdot\text{cm}^{-5}$  compared to an increase of

0.7 dyn·s·cm<sup>-5</sup> with placebo (p=0.02); the least-squares mean change from baseline PVR was -29.8% compared with placebo (p=0.03). 6MWD increased from baseline by 36.2 m with ralinepag and 29.4 m with placebo (p=0.90). Serious adverse events occurred in 10% of ralinepag patients and 29% of placebo patients. Study discontinuations occurred in 13% of ralinepag patients and 10% of placebo patients.

**Summary:** Ralinepag reduced PVR compared with placebo in PAH patients on mono (41%) or dual combination (59%) background therapy.
